# Supplementary material for: Towards quantitative metagenomics of wild viruses and other ultra-low concentration DNA samples: a rigorous assessment and optimization of the linker amplification method
Source: PubMed Central journal article supplement (PMC3466414; doi:10.1111/j.1462-2920.2012.02791.x), 2012-09
Supplement: emi0014-2526-SD6.pdf [file emi0014-2526-SD6.pdf]

**Supplementary Table 1.** Detailed break-down of linker amplification method, including time and cost estimates from sample-to-sequence for a typical 20 L aquatic virus sample.

| <b>1. Ligation</b>      |                                                      | <i>time/sample</i>                  | <i>\$/sample</i> | <i>kit used</i>                                                                                                                |
|-------------------------|------------------------------------------------------|-------------------------------------|------------------|--------------------------------------------------------------------------------------------------------------------------------|
| a                       | Ultrasonic shearing of DNA to 400-800 bp, Covaris    | 1 week*                             | \$20**           | *time depends on turn-around of facility, actually process approx. 5 min; **price includes Agilent Bioanalyzer fragment sizing |
| b                       | Concentrate Sheared DNA                              | 15-20 min                           | \$3.40           | Amicon Ultra-0.5ml 30K (UFC503096)                                                                                             |
| c                       | End repair DNA                                       | 1 hr                                | \$5              | Epicentre Biotechnologies                                                                                                      |
| d                       | Clean-up reaction                                    | 10 min                              | \$2.30           | Qiagen MinElute or QiaQuick (#28104)                                                                                           |
| e                       | Ligate Fwd and Rev linker to DNA                     | 2 hr                                | \$2.40           | Fast-Link Ligation Kit, Epicentre (LK0750)                                                                                     |
| f                       | Clean-up reaction                                    | 10 min                              | \$2.30           | Qiagen MinElute or QiaQuick                                                                                                    |
| f-i                     | Size Fractionation: SPRI Beads                       | 20 min                              | \$0.85           | Agencourt AMPure XP; Beckman Coulter A63880                                                                                    |
|                         | <i>or</i>                                            |                                     |                  |                                                                                                                                |
| f-ii                    | Size Fractionation: gel-sizing                       | 3 hr                                | \$1.40           | Seakem GTG Agarose                                                                                                             |
|                         | DNA recovery: gel extraction                         | 0.5 hr                              | \$2.20           | QiaQuick MinElute gel extraction kit                                                                                           |
|                         | <i>or</i>                                            |                                     |                  |                                                                                                                                |
| f-iii                   | Size Fractionation: Pippin Prep                      | 5 min                               | \$11.25          | Sage Science cassette kit                                                                                                      |
| <b>2. Amplification</b> |                                                      | <i>time/sample</i>                  | <i>\$/sample</i> | <i>kit used</i>                                                                                                                |
| a                       | Small-scale PCR titration: determine optimal cycle # | 1-2hr                               | \$26.30          | LA TaKaRa HS polymerase                                                                                                        |
| b                       | Large-scale PCR                                      | 1-2hr                               |                  |                                                                                                                                |
| c                       | Reconditioning PCR                                   | 0.5 hr                              |                  |                                                                                                                                |
| d                       | PCR clean-up                                         | 10 min                              | \$2.50           | Qiagen MinElute or QiaQuick                                                                                                    |
| e                       | Pico Green Quantification                            | 0.5hr                               | \$1.00           |                                                                                                                                |
| <b>TOTAL</b>            |                                                      | <b>1-2 days work (1 week wait*)</b> | <b>\$67.50</b>   |                                                                                                                                |
