# Supplementary material for: Towards quantitative metagenomics of wild viruses and other ultra-low concentration DNA samples: a rigorous assessment and optimization of the linker amplification method
Source: PubMed Central journal article supplement (PMC3466414; doi:10.1111/j.1462-2920.2012.02791.x), 2012-09
Supplement: emi0014-2526-SD7.pdf [file emi0014-2526-SD7.pdf]

**Supplementary Table 2.** Comparison of DNA polymerase sensitivity and specificity. PFU Turbo HotStart out-performed LA-TaKaRa in 13 virus samples (blue), while the opposite held for one microbial sample (orange). However, the sensitivity comes at a cost, as PFU 'no template control' amplified at 30 and 35 cycles (red), while TaKaRa did not. All samples had been subjected to the LA protocol through ligation to Linker A and amplification (Supp. Table 1). **+**, amplification confirmed by strong band in post-PCR gel; **-**, no detectable amplification; **±**, faint band indicating small degree of amplification; n.d., no data. <sup>++</sup>microbial samples were sheared by nebulization, rather than Covaris; <sup>\*\*</sup>below detection limit of PicoGreen assay, which in practice is 1-5 pg.

| Sample                                      | Starting DNA (pg/μl) | 20 cycles |          | 25 cycles |          | 30 cycles |          | 35 cycles |          |
|---------------------------------------------|----------------------|-----------|----------|-----------|----------|-----------|----------|-----------|----------|
|                                             |                      | PFU       | TAK      | PFU       | TAK      | PFU       | TAK      | PFU       | TAK      |
| Tara #23 DCM 1:100                          | 229                  | <b>+</b>  | <b>+</b> | <b>+</b>  | <b>+</b> | <b>+</b>  | <b>+</b> | <b>+</b>  | <b>+</b> |
| Tara #30 DCM 1:100                          | 1495                 | <b>+</b>  | <b>+</b> | <b>+</b>  | <b>+</b> | <b>+</b>  | <b>+</b> | <b>+</b>  | <b>+</b> |
| Fitzroy viral 1:100                         | 1.9                  | <b>+</b>  | <b>+</b> | <b>+</b>  | <b>+</b> | <b>+</b>  | <b>+</b> | <b>+</b>  | <b>+</b> |
| Dunk viral 1:100                            | 4.9                  | <b>+</b>  | <b>+</b> | <b>+</b>  | <b>+</b> | <b>+</b>  | <b>+</b> | <b>+</b>  | <b>+</b> |
| Sept/09 B2O micro (16S) 1:100 <sup>++</sup> | 17.4                 | <b>+</b>  | <b>+</b> | <b>+</b>  | <b>+</b> | <b>+</b>  | <b>+</b> | <b>+</b>  | <b>+</b> |
| Aug/09 P26 10m                              | < 1 <sup>**</sup>    | <b>+</b>  | <b>+</b> | <b>+</b>  | <b>+</b> | <b>+</b>  | <b>+</b> | <b>+</b>  | <b>+</b> |
| Jun/09 P26 10m                              | < 1                  | <b>+</b>  | <b>+</b> | <b>+</b>  | <b>+</b> | <b>+</b>  | <b>+</b> | <b>+</b>  | <b>+</b> |
| Trial 1<br>Jun/09 P4 10m 1:10               | 855                  | <b>+</b>  | <b>+</b> | <b>+</b>  | <b>+</b> | <b>+</b>  | <b>+</b> | <b>+</b>  | <b>+</b> |
| Jun/08 P26 10m                              | 6.3                  | -         | -        | ±         | ±        | <b>+</b>  | <b>+</b> | <b>+</b>  | <b>+</b> |
| Feb/09 P26 1000m                            | 6                    | -         | -        | <b>+</b>  | ±        | <b>+</b>  | <b>+</b> | <b>+</b>  | <b>+</b> |
| Jun/09 P4 500m                              | 2.2                  | -         | -        | <b>+</b>  | ±        | <b>+</b>  | <b>+</b> | <b>+</b>  | <b>+</b> |
| Jun/09 P12 2000m                            | < 1                  | -         | -        | -         | -        | <b>+</b>  | -        | <b>+</b>  | <b>+</b> |
| Dec/09 Line67 Open DCM                      | 872                  | <b>+</b>  | <b>+</b> | <b>+</b>  | <b>+</b> | <b>+</b>  | <b>+</b> | <b>+</b>  | <b>+</b> |
| Apr/09 SIO Rep 3-NT                         | 175                  | ±         | ±        | <b>+</b>  | <b>+</b> | <b>+</b>  | <b>+</b> | <b>+</b>  | <b>+</b> |
| No Template Control                         | n.a.                 | -         | -        | -         | -        | <b>+</b>  | -        | <b>+</b>  | -        |
| Trial 2<br>TUSD #20 1:30                    | < 1                  | -         | -        | <b>+</b>  | -        | <b>+</b>  | <b>+</b> | <b>+</b>  | <b>+</b> |
| TUSD #20 1:300                              | < 0.1                | -         | -        | -         | -        | <b>+</b>  | ±        | <b>+</b>  | <b>+</b> |
| TUSD #23 1:30                               | 80.4                 | -         | -        | ±         | -        | <b>+</b>  | <b>+</b> | <b>+</b>  | <b>+</b> |

|         |                               |        |      |      |      |   |      |      |   |   |
|---------|-------------------------------|--------|------|------|------|---|------|------|---|---|
|         | TUSD #23 1:300                | 8.4    | -    | -    | -    | - | +    | -    | + | + |
|         | Jun/08 P26-10m                | < 1    | -    | -    | +    | - | +    | +    | + | + |
|         | Feb/09 P26 2000m              | 3.7    | -    | -    | +    | - | +    | +    | + | + |
|         | Aug/08 P26 10m                | < 1    | -    | -    | +    | - | +    | +    | + | + |
|         | Aug/08 P26 1000m              | < 1    | -    | -    | -    | - | +    | ±    | + | + |
|         | Feb/09 P26 10m                | 3.2    | -    | -    | +    | ± | +    | +    | + | + |
|         | Jun/08 P26 2000m              | < 1    | -    | -    | -    | - | +    | -    | + | + |
|         | <i>No Template Control</i>    | n.a.   | -    | -    | -    | - | -    | -    | - | - |
| Trial 3 | Sept/09 B2 micro (16S)        | 28     | -    | ±    | n.d. | + | -    | +    | - | + |
|         | Jun/10 SIO micro 1:100 (16S)  | 638    | -    | -    | ±    | ± | +    | +    | + | + |
|         | Jun/10 SIO micro 1:1000 (16S) | 1.9    | -    | -    | -    | - | ±    | ±    | + | + |
|         | Dec/09 Fitzroy micro 1:10     | 2900   | +    | +    | +    | + | +    | +    | + | + |
|         | Dec/09 Dunk micro 1:200       | 1220   | +    | +    | +    | + | +    | +    | + | + |
|         | <i>No Template Control</i>    | n.a.   | n.d. | n.d. | -    | - | n.d. | n.d. | - | - |
| Trial 4 | TUSD phage mix (n = 2)        | 100000 | n.d. | n.d. | +    | + | +    | +    | + | + |
|         | TUSD phage mix (n = 2)        | 10000  | n.d. | n.d. | +    | + | +    | +    | + | + |
|         | TUSD phage mix (n = 2)        | 3300   | n.d. | n.d. | ±    | + | +    | +    | + | + |
|         | TUSD phage mix (n = 2)        | 1000   | n.d. | n.d. | -    | ± | +    | +    | + | + |
|         | TUSD phage mix (n = 2)        | 200    | n.d. | n.d. | -    | - | ±    | +    | + | + |
|         | <i>No Template Control</i>    | n.a.   | n.d. | n.d. | -    | - | -    | -    | - | - |
