# Supplementary material for: Towards quantitative metagenomics of wild viruses and other ultra-low concentration DNA samples: a rigorous assessment and optimization of the linker amplification method
Source: PubMed Central journal article supplement (PMC3466414; doi:10.1111/j.1462-2920.2012.02791.x), 2012-09
Supplement: emi0014-2526-SD8.pdf [file emi0014-2526-SD8.pdf]

**Supplementary Table 3.** Comparison of sheared DNA size-fractionation techniques. All data are post-size selection and determined by the Agilent Bioanalyzer. The three tests were performed with 13.7  $\mu$ l of DNA (183 ng DNA total) from the same pool of sheared starting DNA (Fig. 2a)

| Sample          | Volume recovered in target 400-600 bp range ( $\mu$ l) | [DNA] recovered in target 400-600 bp range (ng/ $\mu$ l) | DNA recovered in target 400-600 bp range (ng) | % recovery of sheared starting DNA (183 ng start) | TARGET RECOVERY EFFICIENCY (% DNA recovered in 400-600 bp) | Actual size range recovered (Fig. 2b) |
|-----------------|--------------------------------------------------------|----------------------------------------------------------|-----------------------------------------------|---------------------------------------------------|------------------------------------------------------------|---------------------------------------|
| Pippin Prep A   | 42                                                     | 1.27                                                     | 53.34                                         | 29                                                | 94                                                         |                                       |
| Pippin Prep B   | 39                                                     | 1.24                                                     | 48.36                                         | 26                                                | 95                                                         | 400-600 bp                            |
| Pippin Prep C   | 39                                                     | 1.37                                                     | 53.43                                         | 29                                                | 96                                                         |                                       |
| Standard Gel 1A | 20                                                     | 3.95                                                     | 79                                            | 43                                                | 64                                                         |                                       |
| Standard Gel 2A | 20                                                     | 4.4                                                      | 88                                            | 48                                                | 74                                                         | 400-750 bp                            |
| Standard Gel 3A | 20                                                     | 4.39                                                     | 87.8                                          | 48                                                | 72                                                         |                                       |
| Ampure Bead 1   | 20                                                     | 5.91                                                     | 118.2                                         | 65                                                | 49                                                         |                                       |
| Ampure Bead 2   | 20                                                     | 5.05                                                     | 101                                           | 55                                                | 46                                                         | 400-950 bp                            |
| Ampure Bead 3   | 20                                                     | 5.34                                                     | 106.8                                         | 58                                                | 50                                                         |                                       |
