# Supplementary material for: Towards quantitative metagenomics of wild viruses and other ultra-low concentration DNA samples: a rigorous assessment and optimization of the linker amplification method
Source: PubMed Central journal article supplement (PMC3466414; doi:10.1111/j.1462-2920.2012.02791.x), 2012-09
Supplement: emi0014-2526-SD9.pdf [file emi0014-2526-SD9.pdf]

**Supplementary Table 4.** Evaluation of Linker Amplification efficiency. Percent DNA recovery (post-shearing) of the concentration, blunt-end repair/reaction clean-up, Linker-A ligation/reaction clean-up, and size fractionation (gel)/recovery of DNA from gel. This is the template DNA used in PCR amplification.

|                       | <b>Sample ID</b>   | <b>ng DNA sheared</b> | <b>ng DNA recovered</b> | <b>% recovery</b> |
|-----------------------|--------------------|-----------------------|-------------------------|-------------------|
| Environmental samples | SIO-3 NT           | 151.7                 | 13.42                   | 8.8               |
|                       | SIO-4 NT           | 148.5                 | 15.78                   | 10.6              |
|                       | SIO-3 CsCl         | 150.4                 | 9.8                     | 6.5               |
|                       | SIO-4 CsCl         | 129.6                 | 8.09                    | 6.2               |
|                       | SIO-3 sucrose      | 148.8                 | 7.7                     | 5.2               |
|                       | SIO-4 sucrose      | 149.9                 |                         | 3.5               |
|                       | TUSD #20a          | 149.3                 | 5.32                    | 3.6               |
| Clonal phage lysates  | TUSD #20b          | 49.8                  | 2.11                    | 4.2               |
|                       | TUSD #21           | 151.2                 | 7.64                    | 5.1               |
|                       | TUSD #22           | 149                   | 6.27                    | 4.2               |
|                       | TUSD #23a          | 148.5                 | 6.3                     | 4.2               |
|                       | TUSD #23b          | 54                    | 1.86                    | 3.4               |
|                       | TUSD #24           | 149.6                 | 8.22                    | 5.5               |
|                       | PSS-2              | 42.4                  | 3.87                    | 9.1               |
|                       | <b>Avg. ± s.d.</b> | 54                    | 1.86                    | <b>5.7 ± 2.3</b>  |
