# Supplementary material for: Towards quantitative metagenomics of wild viruses and other ultra-low concentration DNA samples: a rigorous assessment and optimization of the linker amplification method
Source: PubMed Central journal article supplement (PMC3466414; doi:10.1111/j.1462-2920.2012.02791.x), 2012-09
Supplement: emi0014-2526-SD10.pdf [file emi0014-2526-SD10.pdf]

**Supplementary Table 5.** Increase in DNA as a result of Linker Amplification, from both environmental and phage lysate DNA preps. Starting DNA concentration reflects that after the shearing and linker ligation steps.

|               | Sample        | DNA ng/ul | ng DNA<br>(in 20 $\mu$ l PCR) <sup>1</sup> | ng DNA<br>after PCR <sup>2</sup> | fold-increase |
|---------------|---------------|-----------|--------------------------------------------|----------------------------------|---------------|
| Environmental | SIO-3 NT      | 0.34      | 6.8                                        | 88.53                            | 13            |
|               | SIO-4 NT      | 0.39      | 7.8                                        | 165.43                           | 21            |
|               | SIO-3 CsCl    | 0.25      | 5                                          | 51.74                            | 10            |
|               | SIO-4 CsCl    | 0.21      | 4.2                                        | 46.15                            | 11            |
|               | SIO-3 sucrose | 0.19      | 3.8                                        | 1146.53                          | 302           |
|               | SIO-4 sucrose | 0.25      | 5                                          | 123.93                           | 25            |
| Clonal lysate | TUSD #20      | 0.05      | 1                                          | 1197.17                          | 1197          |
|               | TUSD #21      | 0.22      | 4.4                                        | 1161.31                          | 264           |
|               | TUSD #22      | 0.18      | 3.6                                        | 1361.94                          | 378           |
|               | TUSD #23      | 0.1       | 2                                          | 1287.34                          | 644           |
|               | TUSD #24      | 0.23      | 4.6                                        | 1218.65                          | 265           |
|               | Phage PSS2    | 0.05      | 1                                          | 1235.82                          | 1236          |

<sup>1</sup> PCR reactions run with **PFU-Turbo Hot Start** for 25 cycles

<sup>2</sup> PCR product pooled, purified.
